# Supplementary material for: Preparation of 3D hierarchical porous Co3O4 nanostructures with enhanced performance in lithium-ion batteries
Source: Royal Society of Chemistry journal article supplement (doi:10.1039/c7ra11701a), 2018-01-01
Supplement: c7ra11701a1.pdf [file c7ra11701a1.pdf]

## Supporting Information

### Preparation of 3D Hierarchical Porous $\text{Co}_3\text{O}_4$ Nanostructures with Enhanced Performance in Lithium-Ion Batteries

Xiguang Han,<sup>\*a</sup> Xiao Han,<sup>b</sup> Wenwen Zhan,<sup>a</sup> Rong Li,<sup>a</sup> Fan Wang,<sup>a</sup> Zhaoxiong Xie<sup>\*b</sup>

<sup>a</sup>Jiangsu Key Laboratory of Green Synthetic Chemistry for Functional Materials, Department of Chemistry, School of Chemistry and Chemical Engineering, Jiangsu Normal University, Xuzhou, 221116 (P. R. China). E-mail: xghan@jsnu.edu.cn.

<sup>b</sup>State Key Laboratory of Physical Chemistry of Solid Surfaces & Department of Chemistry, College of Chemistry and Chemical Engineering, Xiamen University, Xiamen 361005, China. E-mail: zxxie@xmu.edu.cn.

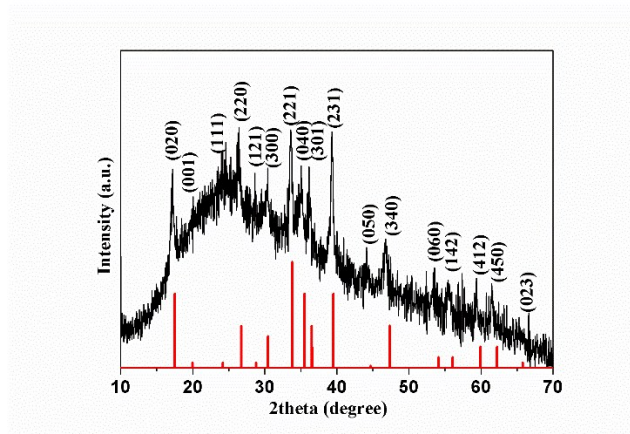

Fig. S1 the XRD pattern of the as-prepared  $\text{Co}(\text{CO}_3)_{0.5}(\text{OH})\cdot 0.11\text{H}_2\text{O}$  precursor (JCPDF NO. 00-048-0083).

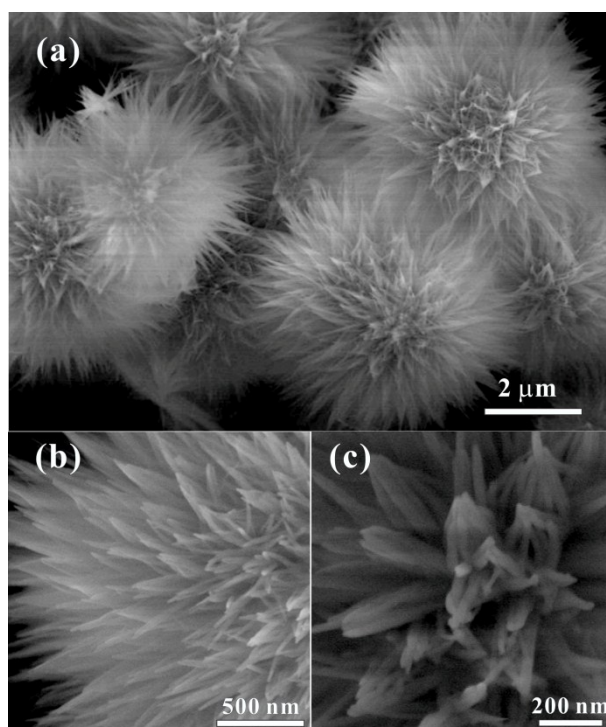

Fig. S2 (a-c) SEM images of  $\text{Co}(\text{CO}_3)_{0.5}(\text{OH}) \cdot 0.1\text{H}_2\text{O}$  precursor.

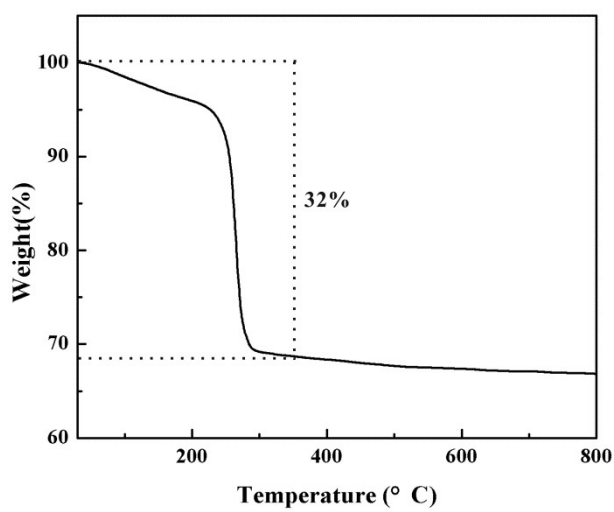

Fig. S3 TGA curves of the as-obtained precursor.

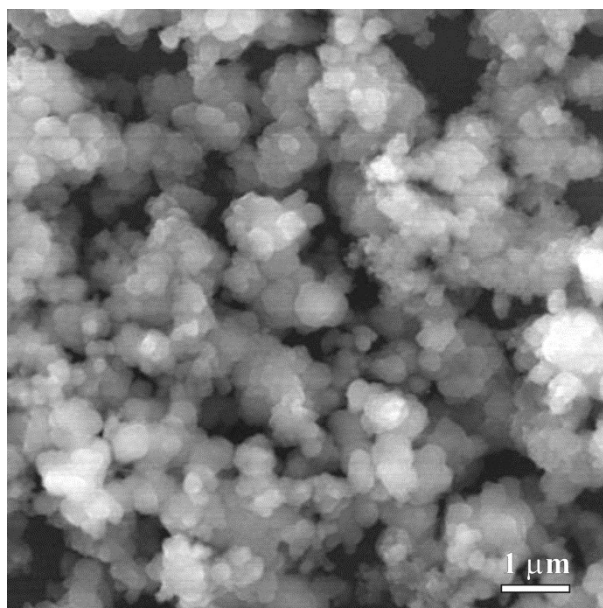

Fig. S4 SEM images of the as-prepared product by the hydrothermal condition without CTAB.

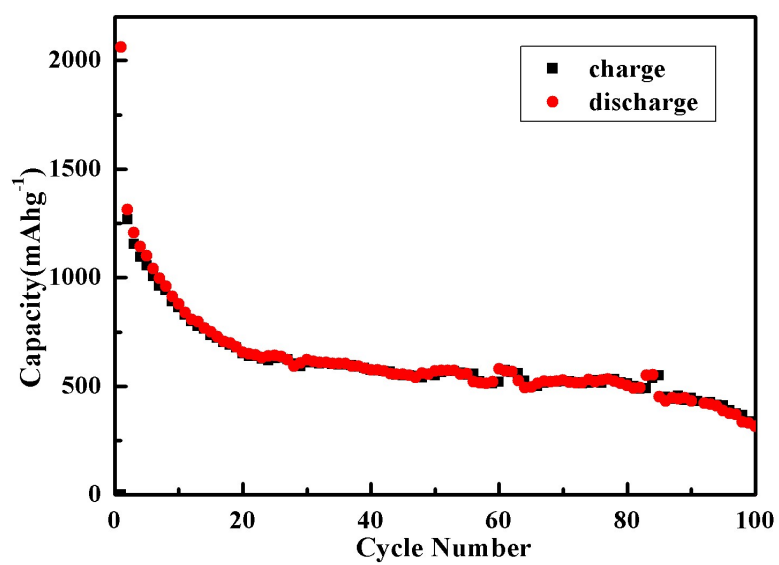

Fig. S5 Cyclic performances of the CPS electrodes at current rate of 0.1 A·g<sup>-1</sup>.

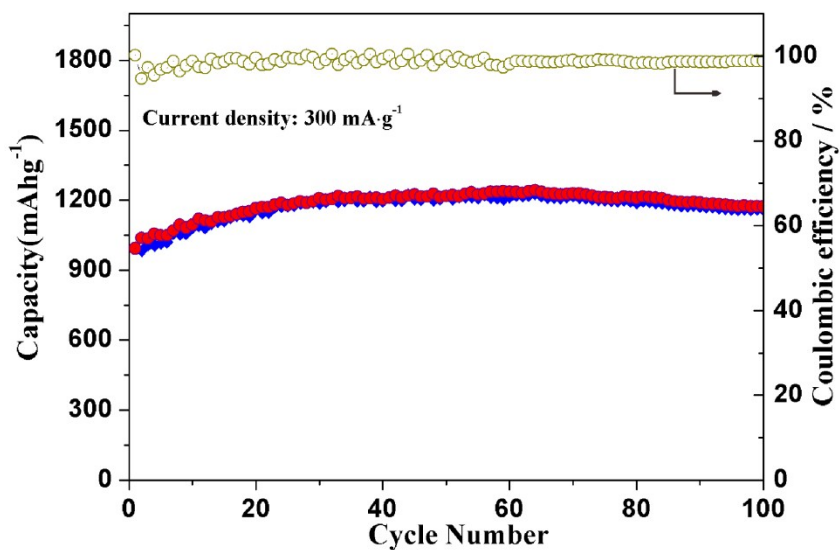

Fig. S6 Cyclic performances of the HCMS electrodes at current rate of 0.3 A·g<sup>-1</sup>

Table S1 Comparison of the LIB performance for different electrodes.

| Active material                                                 | Charging rate<br>(mA·g <sup>-1</sup> ) | Capacity retention<br>(Capacity in<br>mAh·g <sup>-1</sup> ) | Cycle No |
|-----------------------------------------------------------------|----------------------------------------|-------------------------------------------------------------|----------|
| This work                                                       | 100                                    | 1942                                                        | 100      |
|                                                                 | 300                                    | 1173                                                        | 100      |
| Co <sub>3</sub> O <sub>4</sub> nanowires <sup>[1]</sup>         | 111                                    | 700                                                         | 20       |
| Co <sub>3</sub> O <sub>4</sub> cages <sup>[2]</sup>             | 178                                    | 670                                                         | 50       |
| Co <sub>3</sub> O <sub>4</sub> nanosheets <sup>[3]</sup>        | 150                                    | 631                                                         | 50       |
| Co <sub>3</sub> O <sub>4</sub> hexapods <sup>[4]</sup>          | 100                                    | 800                                                         | 40       |
| Co <sub>3</sub> O <sub>4</sub> /NRGO <sup>[5]</sup>             | 100                                    | 910                                                         | 100      |
| Co <sub>3</sub> O <sub>4</sub> nanoparticles/N-C <sup>[6]</sup> | 100                                    | 892                                                         | 100      |
| Co <sub>3</sub> O <sub>4</sub> hexagonal Plates <sup>[7]</sup>  | 200                                    | 829                                                         | 50       |
| Co <sub>3</sub> O <sub>4</sub> NPs@SWCNT <sup>[8]</sup>         | 100                                    | 1286                                                        | 140      |

## 1. References:

1. Y. Li, B. Tan, Y. Wu, Nano Letters 8 (2008), 265-270.

2. X. Wang, L. Yu, X.L. Wu, F. Yuan, Y.G. Guo, Y. Ma, J. Yao, *J. Phys. Chem. C* 113 (2009), 15553-15558.
3. Y. Fan, H. Shao, J. Wang, L. Liu, J. Zhang and C. Cao, *Chem. Commun.* 47 (2011) 3469.
4. L. Wang, B. Liu, S. Ran, H. Huang, X. Wang, B. Liang, D. Chen and G. Shen, *J. Mater. Chem.* 22 (2012), 23541.
5. L. Lai, J. Zhu, Z. Li, D.Y.W. Yu, S. Jiang, X. Cai, Q. Yan, Y.M. Lam, Z. Shen, J. Lin, *Nano Energy* 3 (2014), 134-143.
6. Y. Hou, J. Y. Li, Z. H. Wen, S. M. Cui, C. Yuan, J. H. Chen, *Nano Energy* 12, (2015), 1-8.
7. W. Zhao, X. Zhou, I. J. Kim, S. Kim, *Nanoscale*, 9, (2017) 940.
8. Z. Q. Xie, C. M. Jiang, W. W. Xu, X. D. Cui, C. Reyes, A. Marti, Y. Wang, *Electrochim. Acta*, 235, (2017), 613.
